# Supplementary material for: Efficient passivated phthalocyanine-quantum dot solar cells
Source: Royal Society of Chemistry journal article supplement (doi:10.1039/c4cc08104h), 2014-12-08

## Supplementary Information

# Efficient Passivated Phthalocyanine-Quantum Dot Solar Cells

Vicente M. Blas-Ferrando,<sup>a</sup> Javier Ortiz,<sup>a</sup> Victoria González-Pedro,<sup>b</sup> Rafael S. Sanchez,<sup>b</sup> Ivan Mora-Sero,<sup>b</sup> Fernando Fernández-Lázaro<sup>a</sup> and Ángela Sastre-Santos<sup>\*,a</sup>

*(a) División de Química Orgánica Instituto de Bioingeniería,  
Universidad Miguel Hernández, Elche, Spain*

*(b) Photovoltaic and Optoelectronic Devices Group, Departament de  
Física, Universitat Jaume I, 12071 Castelló, Spain*

*\* To whom correspondence should be addressed.*

E-mail: [asastre@umh.es](mailto:asastre@umh.es),

## CONTENTS

|                                                                                        |    |
|----------------------------------------------------------------------------------------|----|
| (1). Materials and methods.....                                                        | S2 |
| (2). Synthesis of <b>(ZnPcS)<sub>2</sub> 1</b> .....                                   | S4 |
| Fig. S1 <sup>1</sup> H NMR (TFA-d <sub>1</sub> ) of <b>(ZnPcS)<sub>2</sub> 1</b> ..... | S5 |
| Fig. S2 MS of <b>(ZnPcS)<sub>2</sub> 1</b> .....                                       | S5 |
| Fig. S3 IR Spectrum (KBr) of <b>(ZnPcS)<sub>2</sub> 1</b> .....                        | S6 |
| Fig. S4 UV-Vis in (DMF) of <b>(ZnPcS)<sub>2</sub> 1</b> .....                          | S6 |

## Materials and methods for the synthesis of new compounds.

All chemicals were reagent-grade, purchased from commercial sources, and used as received. Column chromatography was performed using SiO<sub>2</sub> (40-63μm) TLC plates coated with SiO<sub>2</sub> 60F254 and visualized by UV light. NMR spectra were measured with a Bruker AC 300. Fluorescence spectra were recorded with Perkin-Elmer LS 55 Luminescence Spectrometer, UV/Vis spectra were recorded with a Helios Gamma spectrophotometer and IR spectra with Nicolet Impact 400D Spectrometer. Mass spectra were obtained from Bruker Microflex matrix-assisted laser desorption/ionization time of flight (MALDI-TOF). CV measurements were performed in a conventional three-electrode cell using a μ-AUTOLAB type III potentiostat/galvanostat at 298 K, over benzonitrile and deaerated sample solutions (~0.5 mM), containing 0.10 M tetrabutylammoniumhexafluorophosphate (TBAPF<sub>6</sub>) as supporting electrolyte. A glassy carbon (GC) working electrode, Ag/AgNO<sub>3</sub> reference electrode and a platinum wire counter electrode were employed. Ferrocene/ferrocenium was used as an internal standard for all measurements.

## Preparation on Sensitized TiO<sub>2</sub>.

The electrode configuration was a transparent layer DSL 18NR-T (20 nm average particle size) and a scattering layer WERO-4 (300\_400 nm particle size distribution). The FTO (SnO<sub>2</sub>:F) coated glass was previously covered by a compact layer of TiO<sub>2</sub> deposited by spray pyrolysis of titanium(IV)bis(acetoacetonato) di(isopropanoxylate). These electrodes were sintered at 450 °C for 30 min.

The mesoporous TiO<sub>2</sub> electrodes were *in situ* sensitized by CdS and CdSe QDs grown by SILAR. For CdS growth the electrodes were successively immersed in two different solutions for 1 min each: one consisting of 0.05 M Cd(OAc)<sub>2</sub> dissolved in ethanol, another of 0.05 M Na<sub>2</sub>S in methanol/Milli-Q ultrapure (1:1). Following each immersion, rinsing and drying was undertaken using pure methanol and a N<sub>2</sub> gun, respectively. All these processes constitute one SILAR cycle. A SILAR of CdSe to obtain the Se precursor, we followed, 0.03 M Cd(NO<sub>3</sub>)<sub>2</sub> dissolved in ethanol, for generated *in situ* Se<sub>2</sub><sup>-</sup> we used 0.03 M of SeO<sub>2</sub> that is diluted in ethanol with NaBH<sub>4</sub>. For sensitization, electrodes were dipped successively in these solutions inside a glove box under N<sub>2</sub> atmosphere. Following each immersion, rinsing and drying was undertaken using pure ethanol and a N<sub>2</sub> gun, respectively.

## Solar Cell Configuration.

The cells were prepared by assembling the counter-electrode and a QD-sensitized electrode using a scotch spacer (thickness 50 μm) and with a droplet (10 μL) of polysulfide electrolyte. Polysulfide electrolyte was 1 M Na<sub>2</sub>S, 1 M S, and 0.1 M NaOH solution in Milli-Q ultrapure water. We have used Cu<sub>2</sub>S counter-electrodes. The Cu<sub>2</sub>S counter-electrodes were prepared by immersing brass in HCl solution at 70°C for 5 min and subsequently dipping it into polysulfide solution for 10 min, resulting in a porous Cu<sub>2</sub>S electrode.<sup>1</sup> The area of the cells was 0.24 cm<sup>2</sup>.

---

<sup>1</sup> G. Hodes, J. Manassen, D. Cahen, *J. Electrochem. Soc.*, 1980, **127**, 544-549.

**Electrode and Cell Characterization.**

The  $J$ - $V$  curves were performed using a solar simulator at AM 1.5 G, where the light intensity was adjusted with an NREL-calibrated Si solar cell to 1 sun intensity ( $100 \text{ mW cm}^{-2}$ ). The IPCE measurements were performed employing a 150 W Xe lamp coupled with a monochromator controlled by a computer; the photocurrent was measured using an optical power meter 70310 from Oriel Instruments, using a Si photodiode to calibrate the system.

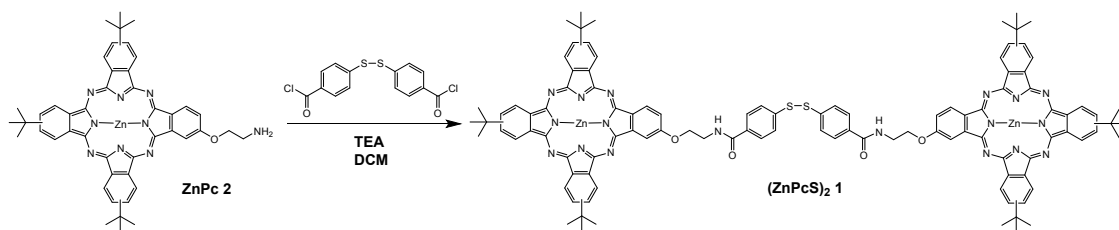

### Synthesis of (ZnPcS)<sub>2</sub> 1

A solution of 49 mg (0.061 mmol) of 2-(2'-aminoethoxy)-9,16,23-tri-tert-butylphthalocyaninato zinc (II)<sup>2</sup> and TEA (0.061 mmol) in DCM (0.5 ml) was added to a solution of 10 mg (0.03 mmol) of 4,4'-dithiobis-benzoyl chloride<sup>3</sup> in 200  $\mu\text{l}$  of DCM at 0°C. After 3 h of stirring at 0°C, the reaction mixture was diluted with DCM and washed with  $\text{NH}_4\text{Cl}$  (aq),  $\text{NaHCO}_3$  (aq) and  $\text{H}_2\text{O}$ . The organic layer was dried with  $\text{Na}_2\text{SO}_4$  and concentrated in vacuum. The crude was purified by column chromatography (DCM:AcOEt/85:15), yielding 54 mg of (ZnPcS)<sub>2</sub> 1 (96%).

- <sup>1</sup>H-NMR (TFA-*d*<sub>1</sub>) 1.68 [s, 54H, 6x(CH<sub>3</sub>)<sub>3</sub>C], 4.27 (s, 4H, CH<sub>2</sub>N), 4.76 (s, 4H, CH<sub>2</sub>O), 7.65-7.83 (m, 10H, ArH), 8.52 (s, 6H, ArH), 8.98-9.51 (m, 16H, ArH).
- IR (KBr):  $\nu$ = 3381, 2956, 2865, 1646, 1611, 1487, 1391, 1330, 1256, 1089, 1047, 921, 830 and 748  $\text{cm}^{-1}$ .
- UV-Vis (DMF),  $\lambda_{\text{max}}$ /nm (log  $\epsilon$ ): 351 (5.09), 610 (4.79) and 675 (5.52).
- HRMS (MALDI-TOF-MS): For C<sub>106</sub>H<sub>96</sub>N<sub>18</sub>O<sub>4</sub>S<sub>2</sub>Zn<sub>2</sub> (M+H)<sup>+</sup> calc. 1877.5959 found 1877.5185.

<sup>2</sup> S. Fukuzumi, K. Ohkubo, J. Ortiz, A. M. Gutiérrez, F. Fernández-Lázaro and Á. Sastre-Santos, *J. Phys. Chem. A*, 2008, **112**, 10744-10752.

<sup>3</sup> S. Moeno, E. Antunes, S. Khene, C. Litwinski and T. Nyokong, *Dalton Trans.*, 2010, **39**, 3460-3471.

**Fig. S1**  $^1\text{H}$  NMR (TFA- $d_1$ ) of  $(\text{ZnPcS})_2$  **1**

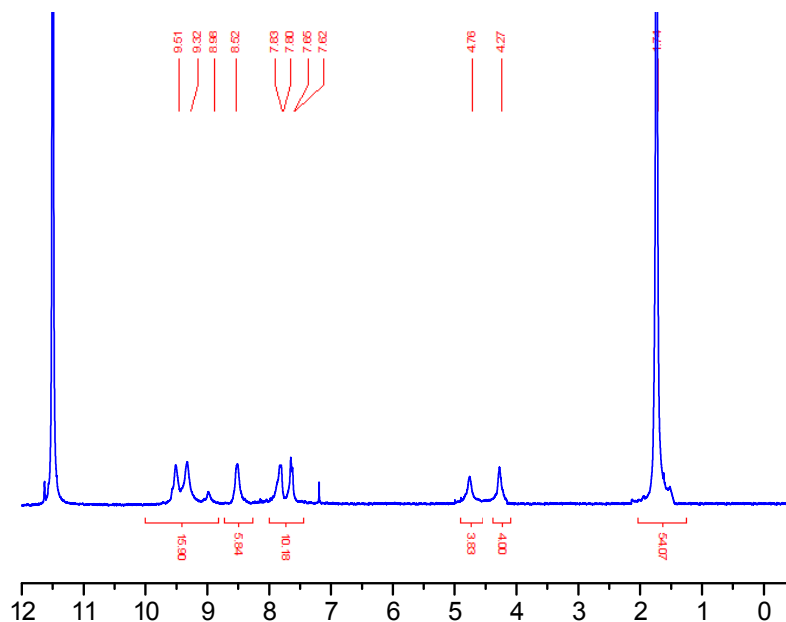

**Fig. S2** MS of  $(\text{ZnPcS})_2$  **1**

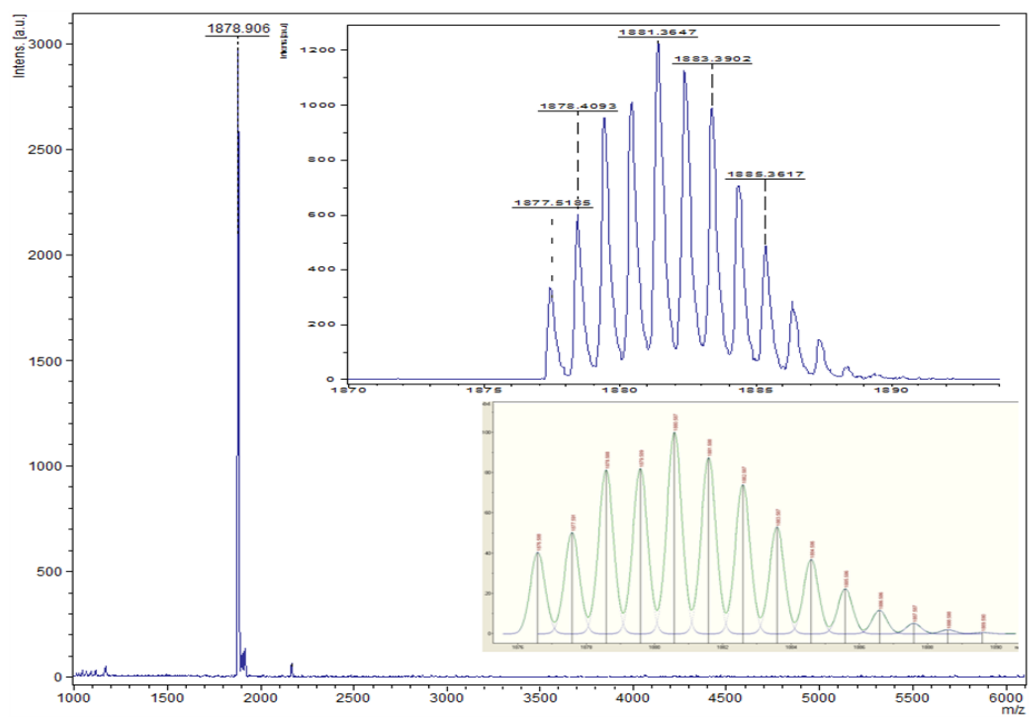

**Fig. S3** IR spectrum (KBr) of  $(\text{ZnPcS})_2$  **1**

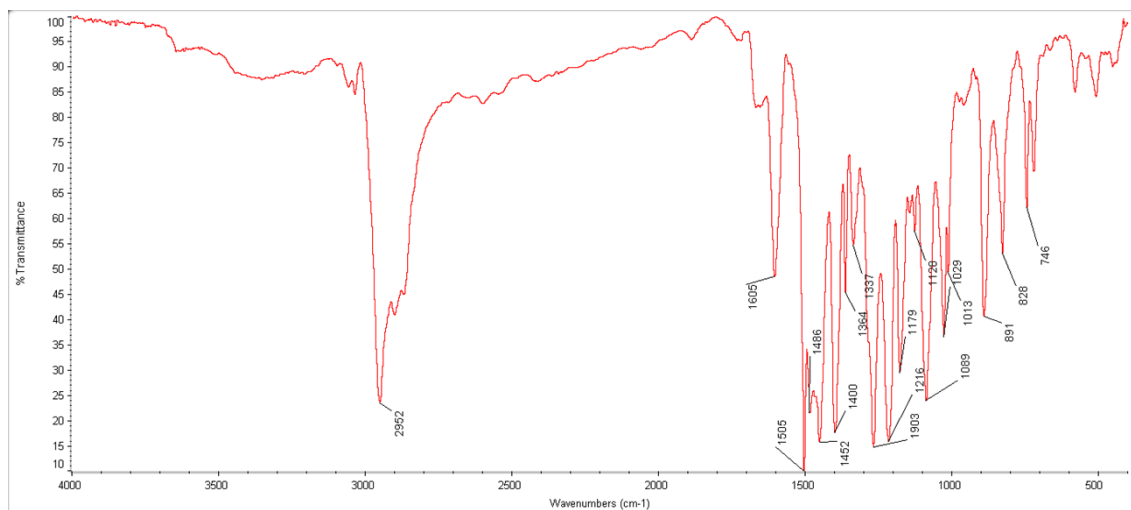

**Fig. S4** UV-Vis in (DMF) of  $(\text{ZnPcS})_2$  **1**

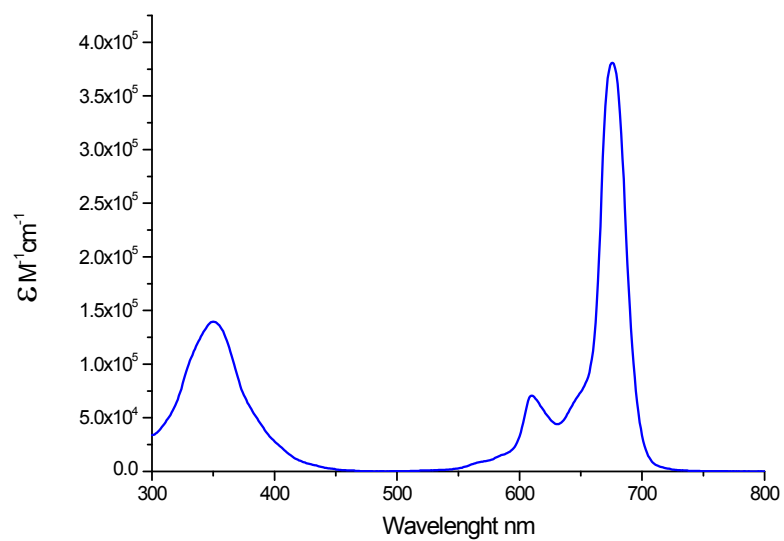

Supplement: c4cc08104h1.pdf [file c4cc08104h1.pdf]
